# Supplementary material for: Encapsulated ruthenium sites in reaction microenvironment-regulated UiO-66 for stable acetylene hydrochlorination
Source: Royal Society of Chemistry journal article supplement (doi:10.1039/d4nr04506h), 2025-01-01
Supplement: d4nr04506h1.pdf [file d4nr04506h1.pdf]

Supporting information for

**Encapsulated Ruthenium sites in reaction microenvironment-regulated UiO-66 for stable acetylene hydrochlorination**

Digao Chai<sup>a</sup>, Qidi Liu<sup>a</sup>, Yunsheng Dai<sup>b</sup>, Yongsheng Xu<sup>a\*</sup>, Yu Zi<sup>a</sup>, Shuo Yang<sup>a</sup>,  
Yanzhao Dong<sup>a</sup>, Dongyang Xie<sup>a</sup>, Jinli Zhang<sup>a, c</sup>, Haiyang Zhang<sup>a\*</sup>

<sup>a</sup> School of Chemistry and Chemical Engineering/State Key Laboratory Incubation Base for Green Processing of Chemical Engineering, Shihezi University, Shihezi 832000, P. R. China

<sup>b</sup> Yunnan Precious Metals Lab Co., Ltd, Kunming 650106, P. R. China

<sup>c</sup> School of Chemical Engineering and Technology, Tianjin University, Tianjin 300354, P. R. China

\* Corresponding author:

**Yongsheng Xu**

E-mail: [2016207134@tju.edu.cn](mailto:2016207134@tju.edu.cn)

**Haiyang Zhang**

E-mail: [zhy198722@163.com](mailto:zhy198722@163.com)

Tel.: +86-993-2057006; Fax: +86-993-2057210.

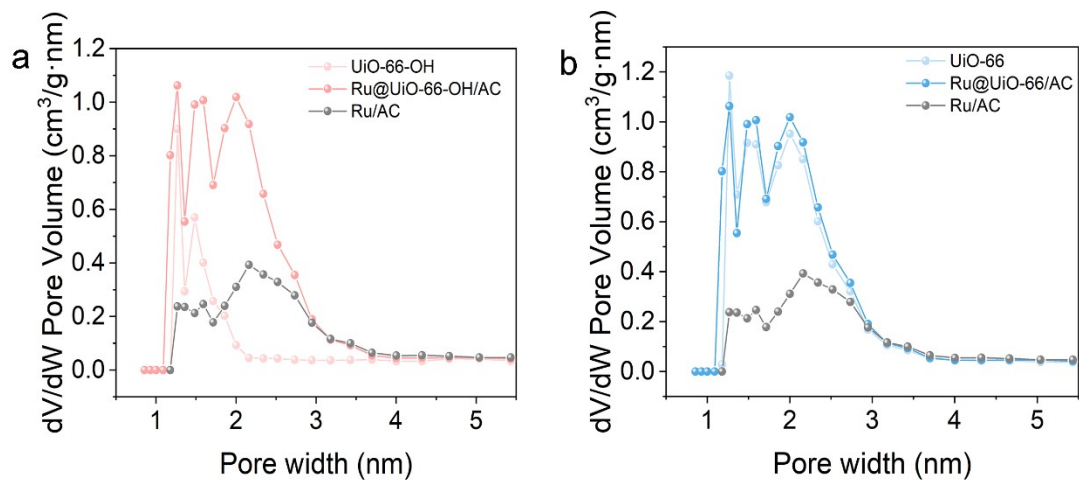

**Fig. S1.** Pore size distribution image of (a) Ru@UiO-66-OH/AC and (b) Ru@UiO66/AC.

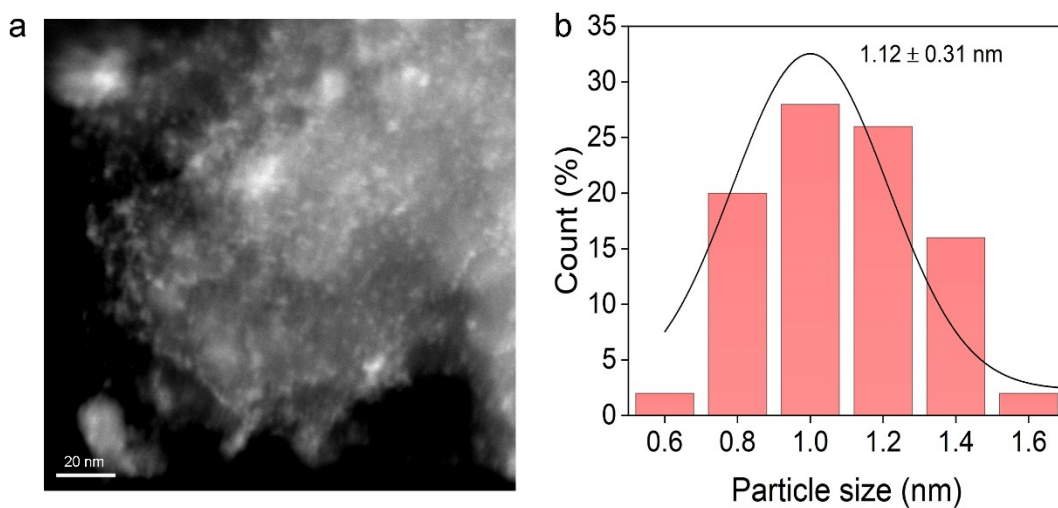

**Fig. S2.** (a) HADDF-TEM image of fresh Ru/AC and (b) particle size distribution images.

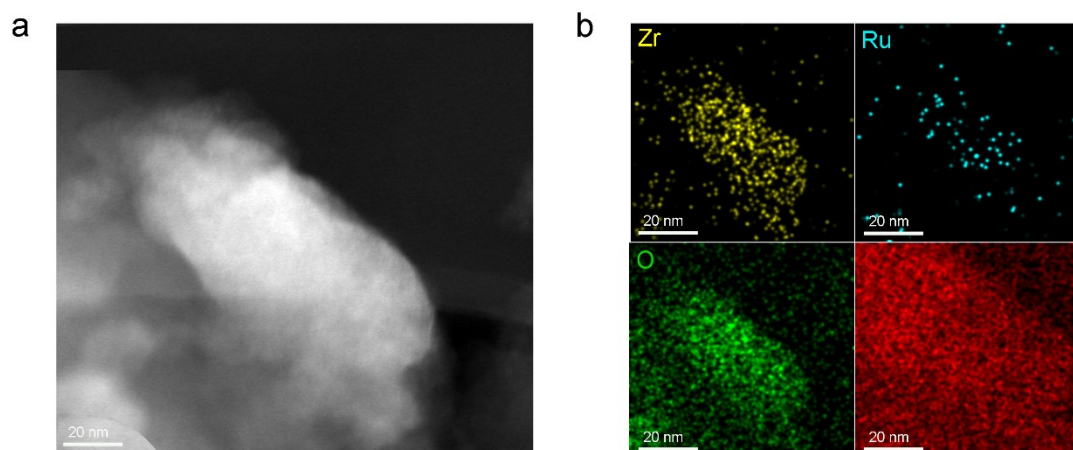

**Figure S3.** (a) HADDF-TEM image and (b) the relative elemental mapping images of fresh Ru@UiO-66/AC catalyst.

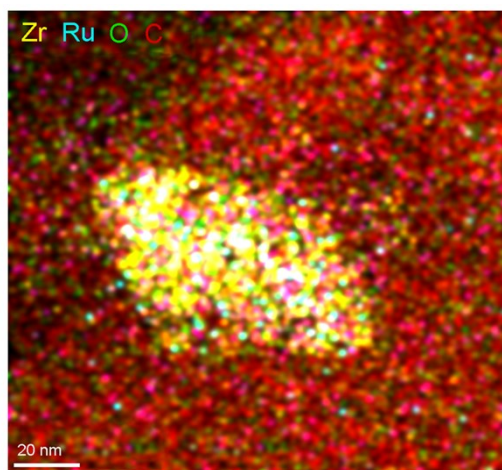

**Fig. S4.** Overlay image of Ru, O, C and Zr elements.

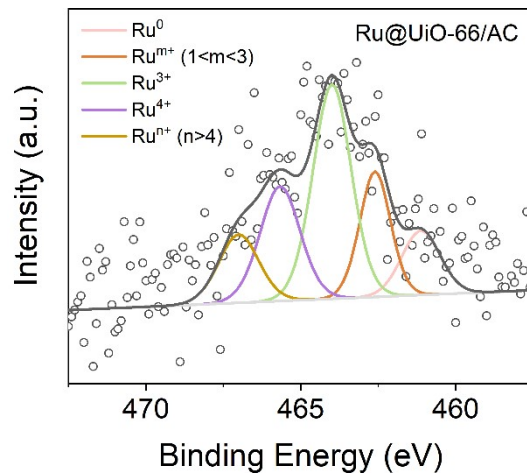

Fig. S5. Ru 3p XPS spectrum of Ru@UiO-66/AC.

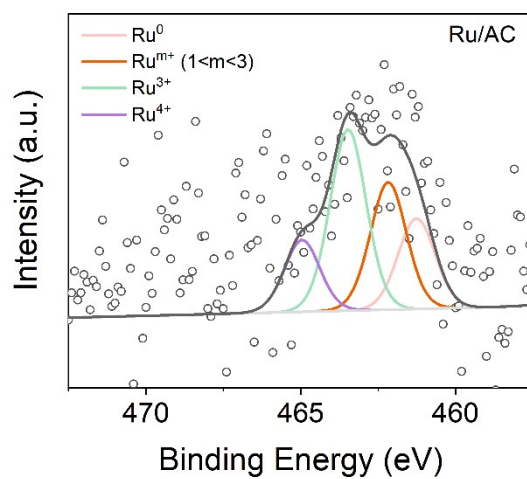

Fig. S6. Ru 3p XPS spectrum of Ru/AC.

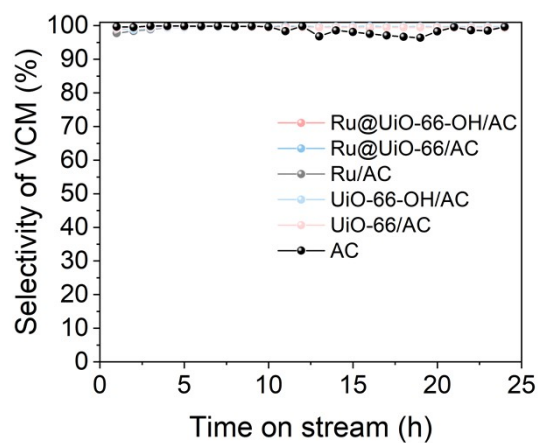

**Fig. S7.** Selectivity to VCM of Ru-based catalysts and UiO-66-based catalysts.

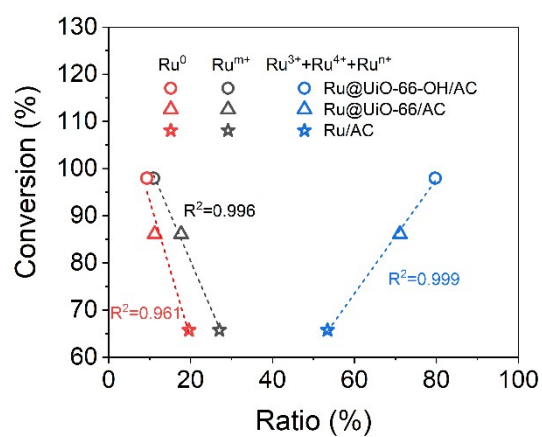

**Fig. S8.** Relationship between chemical state of Ru species and conversion.

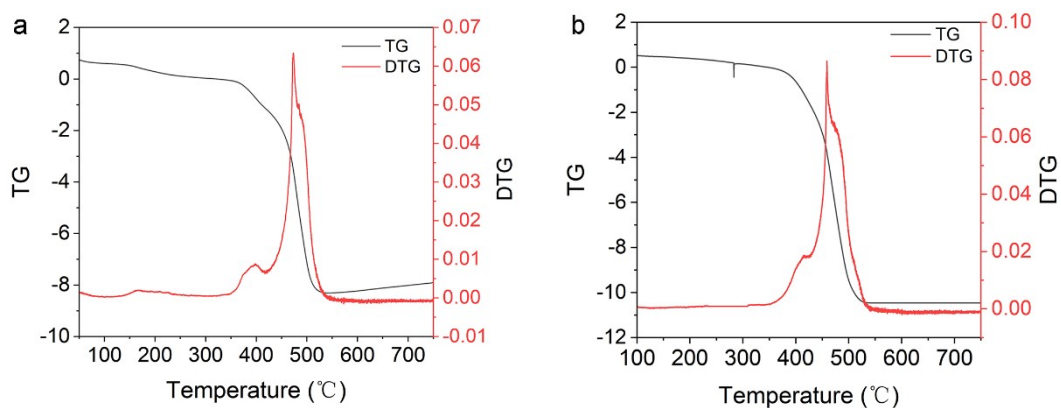

**Figure S9.** TGA and DTG curves of the fresh (a) Ru@UiO-66-OH/AC and (b) Ru@UiO-66/AC.

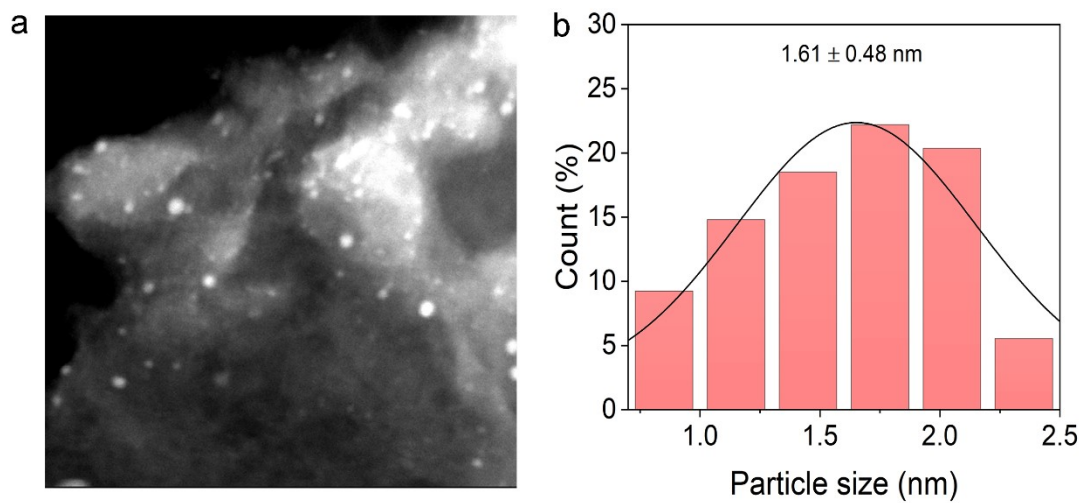

**Figure S10.** (a) HADDF-TEM image and (b) particle size distribution of used Ru/AC.

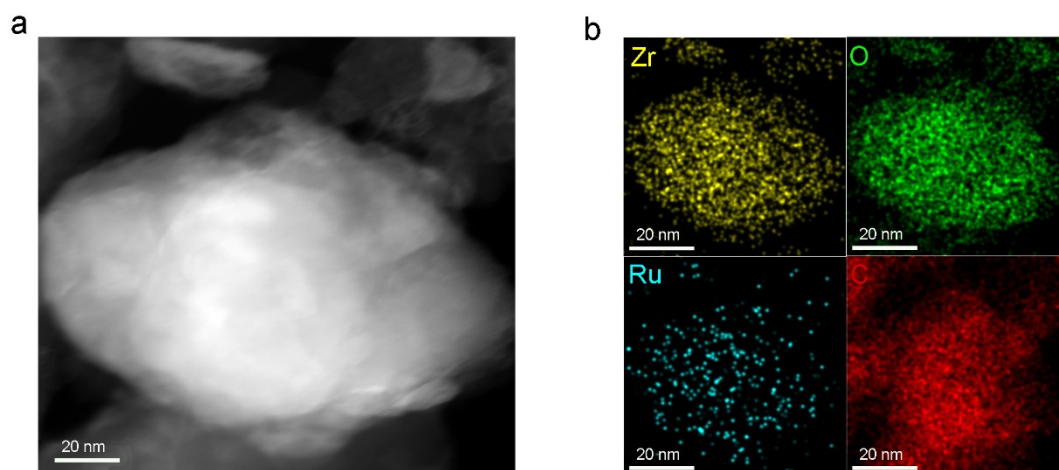

**Figure S11.** (a) HADDF-TEM image and (b) the relative elemental mapping images of used Ru@UiO-66/AC catalyst.

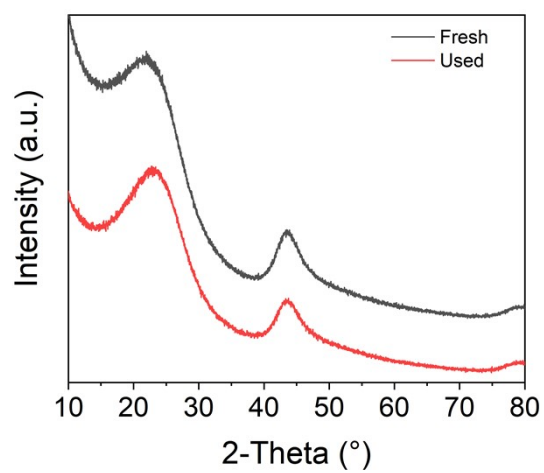

**Figure S12.** XRD patterns of baseline catalyst.

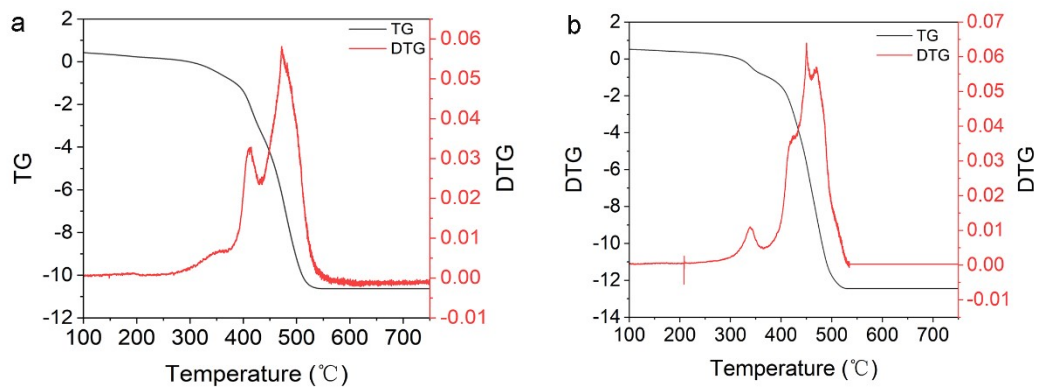

**Figure S13.** TGA and DTG curves of the used (a) Ru@UiO-66-OH/AC catalyst and (b) Ru@UiO-66/AC catalyst.

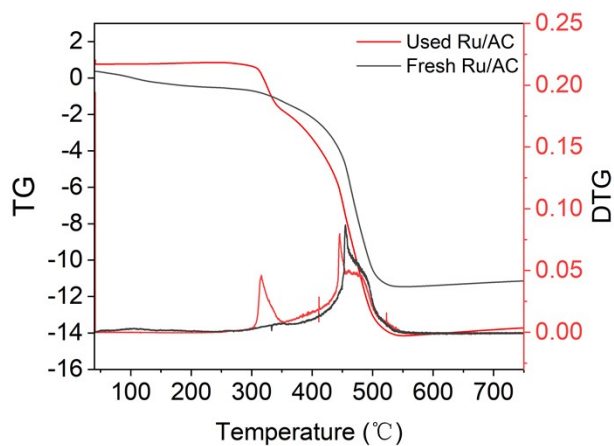

**Figure S14.** TGA and DTG curves of the fresh and used Ru /AC catalyst.



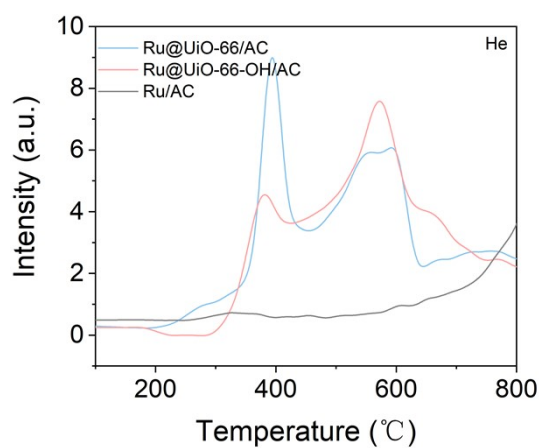

**Figure S15.** He-TPD profiles of the Ru@UiO-66-OH/AC, Ru@UiO-66/AC and Ru/AC.

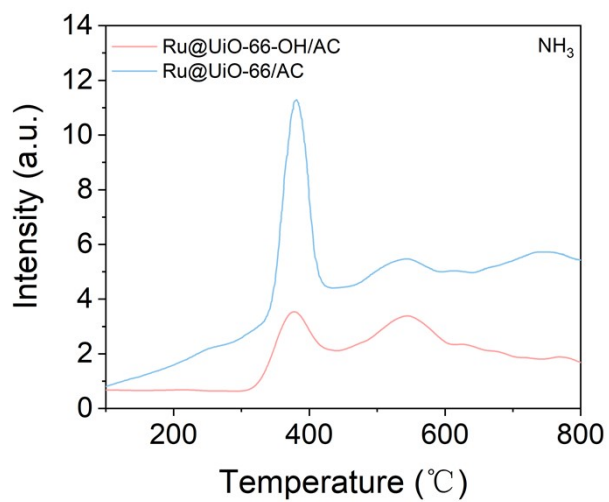

**Figure S16.** NH<sub>3</sub>-TPD profiles of the Ru@UiO-66-OH/AC, Ru@UiO-66/AC and Ru/AC.

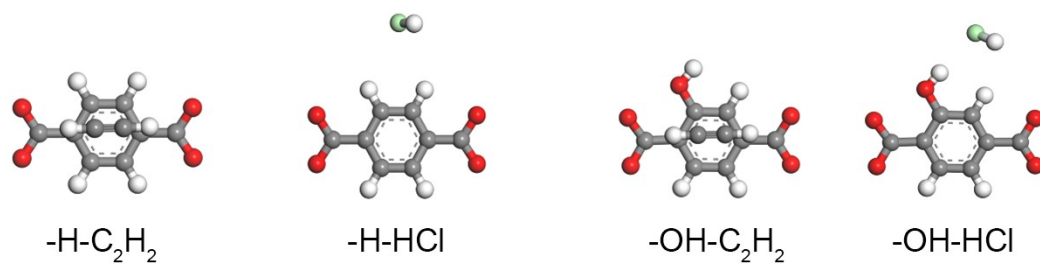

**Figure S17.** Adsorption models of  $\text{C}_2\text{H}_2$  and  $\text{HCl}$  on the unit of linkers. Atom: C, grey; H, white; O, red; Cl, green.

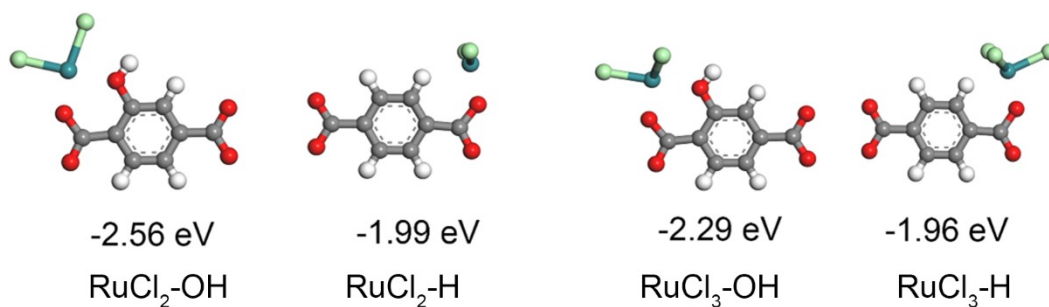

**Figure S18.** Formation models and energies between  $\text{RuCl}_x$  species and the relative linkers. Atom: C, grey; H, white; O, red; Cl, green.

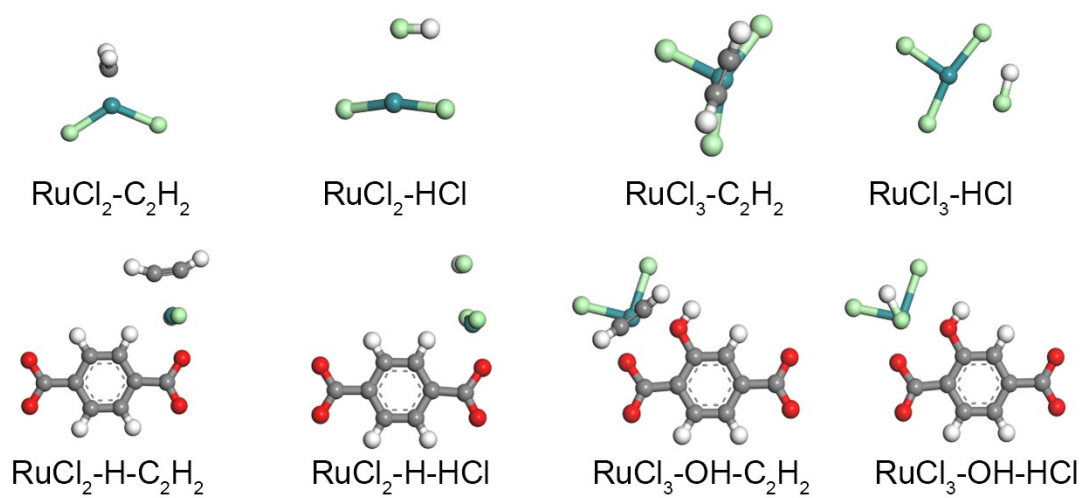

**Figure S19.** Adsorption models of  $\text{C}_2\text{H}_2$  and  $\text{HCl}$  on the relative Ru sites. Atom: C, grey; H, white; O, red; Cl, green.

**Table S1.** The relative content of Ru species in Ru@UiO-66-OH/AC and Ru@UiO-66/AC catalysts.

| Catalyst                 |         | Ru@UiO-66-OH/AC | Ru@UiO-66/AC | Ru/AC  |
|--------------------------|---------|-----------------|--------------|--------|
| Ru <sup>0+</sup>         | Binding |                 |              |        |
|                          | energy  | 460.98          | 461.12       | 461.26 |
|                          | (eV)    |                 |              |        |
|                          | Ratio   | 9.33            | 11.23        | 19.58  |
| Ru <sup>m+</sup> (1<m<3) | Binding |                 |              |        |
|                          | energy  | 462.52          | 462.6        | 462.17 |
|                          | (eV)    |                 |              |        |
|                          | Ratio   | 10.95           | 17.68        | 27.01  |
| Ru <sup>3+</sup>         | Binding |                 |              |        |
|                          | energy  | 463.77          | 463.99       | 463.47 |
|                          | (eV)    |                 |              |        |
|                          | Ratio   | 36.73           | 37.50        | 38.41  |
| Ru <sup>4+</sup>         | Binding |                 |              |        |
|                          | energy  | 465.48          | 465.67       | 464.96 |
|                          | (eV)    |                 |              |        |
|                          | Ratio   | 33.05           | 21.08        | 14.99  |
| Ru <sup>n+</sup> (n>4)   | Binding |                 |              |        |
|                          | energy  | 467.26          | 467.01       | /      |
|                          | (eV)    |                 |              |        |
|                          | Ratio   | 9.94            | 12.51        | /      |
|                          |         |                 |              |        |
